# Supplementary material for: Data Ethics Emergency Drill: A Toolbox for Discussing Responsible AI for Industry Teams
Source: Atypon-hosted journal article supplement (doi:10.1145/3613904.3642402), 2024-05-11
Supplement: pn1619-supplemental-material-2.pdf [file pn1619-supplemental-material-2.pdf]

## Post-Session Questionnaire

1. How well prepared do you feel for addressing data ethics issues in your models? (modified according to topic of scenario)
2. How concerned are you about data ethics issues in your models on a day-to-day basis? (modified according to topic of scenario)
3. How often do data ethics issues come up on a day-to-day basis? (modified according to topic of scenario)
4. Do you think any of the answers to these questions changed with respect to the pre-session survey? If they changed, what made you change your answers?
5. How realistic did you find the part N of the drill?
6. How realistic did you find the scenario of the drill as a whole?
7. Please explain why or why not you thought the scenarios were realistic or unrealistic:
8. Do you think realism was important for your experience of the emergency drill? Why or why not?
9. Did you find the part N of the drill thought-provoking or less so?
10. Did you find the emergency drill as a whole thought-provoking or less so?
11. Describe any new thoughts, reflections or ideas resulting from the
12. scenarios (which you haven't expressed in the reflection activity in
13. this survey) or why you did not find the drill thought-provoking:
14. Did the part N of the drill spark a useful discussion or not?
15. Did the emergency drill as a whole spark a useful discussion or not?
16. Please explain why or why not you thought the discussion was useful:
17. Did you find the reflection activity in this survey useful or less so?
18. Please explain why or why not you thought the reflection activity was useful:
19. Please describe how you felt during the course of the data ethics emergency drill: (This could be regarding the situation presented or about your individual data science work or the experience of the data ethics emergency drill as a group activity.)
20. What changes would you like to see in a second edition of the emergency drill?
21. Can you think of other data ethics situations where this emergency drill could be helpful? What are they?
22. How did you find interacting with your colleagues through this methodology? Was it natural or unnatural?
23. Do you think the session changed any relationships between you and your team members? If so, how?
